# Supplementary material for: Closed-shell and open-shell square-planar iridium nitrido complexes
Source: Springer Nature journal article supplement (doi:10.1038/nchem.1368), 2012-06-01
Supplement: 41557_2012_BFnchem1368_MOESM9_ESM.cif [file 41557_2012_BFnchem1368_MOESM9_ESM.cif]

 
data_msb1203 
 
_audit_creation_method            SHELXL-97 
_chemical_name_systematic 
; 
 ? 
; 
_chemical_name_common             ? 
_chemical_melting_point           ? 
_chemical_formula_moiety          'C40 H80 Ir2 N4 P4'
_chemical_formula_sum             'C40 H80 Ir2 N4 P4' 
_chemical_formula_weight          1125.36 
 
loop_ 
 _atom_type_symbol 
 _atom_type_description 
 _atom_type_scat_dispersion_real 
 _atom_type_scat_dispersion_imag 
 _atom_type_scat_source 
 'C'  'C'   0.0033   0.0016 
 'International Tables Vol C Tables 4.2.6.8 and 6.1.1.4' 
 'H'  'H'   0.0000   0.0000 
 'International Tables Vol C Tables 4.2.6.8 and 6.1.1.4' 
 'N'  'N'   0.0061   0.0033 
 'International Tables Vol C Tables 4.2.6.8 and 6.1.1.4' 
 'P'  'P'   0.1023   0.0942 
 'International Tables Vol C Tables 4.2.6.8 and 6.1.1.4' 
 'Ir'  'Ir'  -1.4442   7.9887 
 'International Tables Vol C Tables 4.2.6.8 and 6.1.1.4' 
 
_symmetry_cell_setting            triclinic
_symmetry_space_group_name_H-M    P-1
_symmetry_space_group_name_Hall   -P1

 
loop_ 
 _symmetry_equiv_pos_as_xyz 
 'x, y, z' 
 '-x, -y, -z' 
 
_cell_length_a                    11.5257(10) 
_cell_length_b                    13.0336(11) 
_cell_length_c                    17.1075(14) 
_cell_angle_alpha                 79.173(2) 
_cell_angle_beta                  89.524(2) 
_cell_angle_gamma                 68.544(2) 
_cell_volume                      2344.1(3) 
_cell_formula_units_Z             2 
_cell_measurement_temperature     100(2) 
_cell_measurement_reflns_used     9957
_cell_measurement_theta_min        2.68
_cell_measurement_theta_max       29.55
 
_exptl_crystal_description        block
_exptl_crystal_colour             'orange-brown'
_exptl_crystal_size_max           0.14 
_exptl_crystal_size_mid           0.10 
_exptl_crystal_size_min           0.08 
_exptl_crystal_density_meas       ? 
_exptl_crystal_density_diffrn     1.594 
_exptl_crystal_density_method     'not measured' 
_exptl_crystal_F_000              1124 
_exptl_absorpt_coefficient_mu     5.838 
_exptl_absorpt_correction_type    multi-scan
_exptl_absorpt_correction_T_min   0.633
_exptl_absorpt_correction_T_max   0.746 
_exptl_absorpt_process_details    'SADABS, Bruker-AXS, 2009'
 
_exptl_special_details 
; 
 ? 
; 
 
_diffrn_ambient_temperature       100(2) 
_diffrn_radiation_wavelength      0.71073 
_diffrn_radiation_type            MoK\a 
_diffrn_radiation_source          'ImuS micro-focus tube' 
_diffrn_radiation_monochromator   'Quazar focussing montel optics' 
_diffrn_measurement_device_type   'Bruker Kappa APEX II CCD area detector'
_diffrn_measurement_method        'phi and omega scans'
_diffrn_detector_area_resol_mean  83.33 
_diffrn_standards_number          ? 
_diffrn_standards_interval_count  ? 
_diffrn_standards_interval_time   ? 
_diffrn_standards_decay_%         ? 
_diffrn_reflns_number             41721 
_diffrn_reflns_av_R_equivalents   0.0373 
_diffrn_reflns_av_sigmaI/netI     0.0390 
_diffrn_reflns_limit_h_min        -15 
_diffrn_reflns_limit_h_max        15 
_diffrn_reflns_limit_k_min        -17 
_diffrn_reflns_limit_k_max        17 
_diffrn_reflns_limit_l_min        -22 
_diffrn_reflns_limit_l_max        23 
_diffrn_reflns_theta_min          2.26 
_diffrn_reflns_theta_max          28.70 
_reflns_number_total              12123 
_reflns_number_gt                 9965 
_reflns_threshold_expression      >2sigma(I) 
 
_computing_data_collection        'Bruker APEX2'
_computing_cell_refinement        'Bruker SAINT' 
_computing_data_reduction         'Bruker SAINT' 
_computing_structure_solution     'SHELXTL 6.12 (Bruker AXS, 2002)'
_computing_structure_refinement   'SHELXTL 6.12 (Bruker AXS, 2002)'
_computing_molecular_graphics     'SHELXTL 6.12 (Bruker AXS, 2002)'
_computing_publication_material   'SHELXTL 6.12 (Bruker AXS, 2002)'
 
_refine_special_details 
; 
 Refinement of F^2^ against ALL reflections.  The weighted R-factor wR and 
 goodness of fit S are based on F^2^, conventional R-factors R are based 
 on F, with F set to zero for negative F^2^. The threshold expression of 
 F^2^ > 2sigma(F^2^) is used only for calculating R-factors(gt) etc. and is 
 not relevant to the choice of reflections for refinement.  R-factors based 
 on F^2^ are statistically about twice as large as those based on F, and R- 
 factors based on ALL data will be even larger. 
; 
 
_refine_ls_structure_factor_coef  Fsqd  
_refine_ls_matrix_type            full 
_refine_ls_weighting_scheme       calc  
_refine_ls_weighting_details 
 'calc w=1/[\s^2^(Fo^2^)+(0.0207P)^2^+1.1110P] where P=(Fo^2^+2Fc^2^)/3' 
_atom_sites_solution_primary      direct 
_atom_sites_solution_secondary    difmap 
_atom_sites_solution_hydrogens    geom 
_refine_ls_hydrogen_treatment     constr 
_refine_ls_extinction_method      none 
_refine_ls_extinction_coef        ? 
_refine_ls_number_reflns          12123 
_refine_ls_number_parameters      475 
_refine_ls_number_restraints      0 
_refine_ls_R_factor_all           0.0360 
_refine_ls_R_factor_gt            0.0249 
_refine_ls_wR_factor_ref          0.0539 
_refine_ls_wR_factor_gt           0.0501 
_refine_ls_goodness_of_fit_ref    1.025 
_refine_ls_restrained_S_all       1.025 
_refine_ls_shift/su_max           0.002 
_refine_ls_shift/su_mean          0.000 
 
loop_ 
 _atom_site_label 
 _atom_site_type_symbol 
 _atom_site_fract_x 
 _atom_site_fract_y 
 _atom_site_fract_z 
 _atom_site_U_iso_or_equiv 
 _atom_site_adp_type 
 _atom_site_occupancy 
 _atom_site_symmetry_multiplicity 
 _atom_site_calc_flag 
 _atom_site_refinement_flags 
 _atom_site_disorder_assembly 
 _atom_site_disorder_group 
Ir1 Ir 0.164890(11) 0.188061(10) 0.191770(6) 0.01274(3) Uani 1 1 d . . . 
Ir2 Ir 0.214866(11) 0.470430(10) 0.335790(6) 0.01276(3) Uani 1 1 d . . . 
P1 P 0.35262(8) 0.14015(7) 0.13148(5) 0.01596(17) Uani 1 1 d . . . 
P2 P -0.02451(8) 0.18386(7) 0.23868(5) 0.01642(17) Uani 1 1 d . . . 
P3 P 0.30432(8) 0.35689(7) 0.45924(5) 0.01436(16) Uani 1 1 d . . . 
P4 P 0.14331(8) 0.62862(7) 0.23185(5) 0.01632(17) Uani 1 1 d . . . 
N1 N 0.1315(3) 0.0942(2) 0.11807(15) 0.0174(6) Uani 1 1 d . . . 
N2 N 0.1934(2) 0.5923(2) 0.39973(15) 0.0164(6) Uani 1 1 d . . . 
N3 N 0.1941(2) 0.2899(2) 0.25125(14) 0.0154(5) Uani 1 1 d . . . 
N4 N 0.2099(2) 0.3554(2) 0.28057(15) 0.0159(5) Uani 1 1 d . . . 
C1 C 0.2174(3) 0.0515(3) 0.06454(18) 0.0185(7) Uani 1 1 d . . . 
H1 H 0.1979 0.0110 0.0293 0.022 Uiso 1 1 calc R . . 
C2 C 0.3277(3) 0.0649(3) 0.06024(18) 0.0187(7) Uani 1 1 d . . . 
H2 H 0.3867 0.0370 0.0229 0.022 Uiso 1 1 calc R . . 
C3 C 0.0236(3) 0.0739(3) 0.11895(19) 0.0220(7) Uani 1 1 d . . . 
H3 H 0.0092 0.0335 0.0817 0.026 Uiso 1 1 calc R . . 
C4 C -0.0637(3) 0.1096(3) 0.1714(2) 0.0246(8) Uani 1 1 d . . . 
H4 H -0.1395 0.0964 0.1725 0.029 Uiso 1 1 calc R . . 
C5 C 0.4876(3) 0.0348(3) 0.20014(19) 0.0225(7) Uani 1 1 d . . . 
C6 C 0.6137(3) -0.0016(3) 0.1617(2) 0.0336(9) Uani 1 1 d . . . 
H6A H 0.6766 -0.0622 0.1993 0.050 Uiso 1 1 calc R . . 
H6B H 0.6402 0.0626 0.1482 0.050 Uiso 1 1 calc R . . 
H6C H 0.6048 -0.0285 0.1132 0.050 Uiso 1 1 calc R . . 
C7 C 0.4536(4) -0.0689(3) 0.2266(2) 0.0308(9) Uani 1 1 d . . . 
H7A H 0.4511 -0.1031 0.1805 0.046 Uiso 1 1 calc R . . 
H7B H 0.3714 -0.0466 0.2488 0.046 Uiso 1 1 calc R . . 
H7C H 0.5164 -0.1235 0.2672 0.046 Uiso 1 1 calc R . . 
C8 C 0.4996(4) 0.0835(3) 0.2734(2) 0.0311(9) Uani 1 1 d . . . 
H8A H 0.5671 0.0277 0.3106 0.047 Uiso 1 1 calc R . . 
H8B H 0.4209 0.1024 0.2998 0.047 Uiso 1 1 calc R . . 
H8C H 0.5185 0.1515 0.2565 0.047 Uiso 1 1 calc R . . 
C9 C 0.3957(3) 0.2543(3) 0.06946(19) 0.0218(7) Uani 1 1 d . . . 
C10 C 0.4566(4) 0.3071(3) 0.1215(2) 0.0298(8) Uani 1 1 d . . . 
H10A H 0.4634 0.3752 0.0895 0.045 Uiso 1 1 calc R . . 
H10B H 0.5402 0.2532 0.1418 0.045 Uiso 1 1 calc R . . 
H10C H 0.4053 0.3267 0.1663 0.045 Uiso 1 1 calc R . . 
C11 C 0.2710(3) 0.3415(3) 0.0303(2) 0.0252(8) Uani 1 1 d . . . 
H11A H 0.2161 0.3704 0.0716 0.038 Uiso 1 1 calc R . . 
H11B H 0.2313 0.3063 -0.0012 0.038 Uiso 1 1 calc R . . 
H11C H 0.2857 0.4037 -0.0047 0.038 Uiso 1 1 calc R . . 
C12 C 0.4810(4) 0.2160(3) 0.0029(2) 0.0349(9) Uani 1 1 d . . . 
H12A H 0.4973 0.2801 -0.0280 0.052 Uiso 1 1 calc R . . 
H12B H 0.4401 0.1863 -0.0323 0.052 Uiso 1 1 calc R . . 
H12C H 0.5601 0.1571 0.0264 0.052 Uiso 1 1 calc R . . 
C13 C -0.0172(3) 0.0918(3) 0.34003(19) 0.0179(7) Uani 1 1 d . . . 
C14 C 0.1163(3) 0.0039(3) 0.3531(2) 0.0237(7) Uani 1 1 d . . . 
H14A H 0.1756 0.0416 0.3542 0.036 Uiso 1 1 calc R . . 
H14B H 0.1335 -0.0378 0.3096 0.036 Uiso 1 1 calc R . . 
H14C H 0.1250 -0.0485 0.4040 0.036 Uiso 1 1 calc R . . 
C15 C -0.1090(3) 0.0306(3) 0.3443(2) 0.0257(8) Uani 1 1 d . . . 
H15A H -0.1010 -0.0156 0.3978 0.039 Uiso 1 1 calc R . . 
H15B H -0.0901 -0.0178 0.3047 0.039 Uiso 1 1 calc R . . 
H15C H -0.1946 0.0859 0.3332 0.039 Uiso 1 1 calc R . . 
C16 C -0.0409(3) 0.1597(3) 0.40681(19) 0.0244(8) Uani 1 1 d . . . 
H16A H -0.0153 0.1081 0.4586 0.037 Uiso 1 1 calc R . . 
H16B H -0.1301 0.2059 0.4051 0.037 Uiso 1 1 calc R . . 
H16C H 0.0075 0.2086 0.3993 0.037 Uiso 1 1 calc R . . 
C17 C -0.1634(3) 0.3186(3) 0.2270(2) 0.0224(7) Uani 1 1 d . . . 
C18 C -0.2853(3) 0.3017(3) 0.2491(2) 0.0318(9) Uani 1 1 d . . . 
H18A H -0.3559 0.3736 0.2343 0.048 Uiso 1 1 calc R . . 
H18B H -0.2817 0.2735 0.3067 0.048 Uiso 1 1 calc R . . 
H18C H -0.2963 0.2471 0.2205 0.048 Uiso 1 1 calc R . . 
C19 C -0.1422(3) 0.3993(3) 0.2752(2) 0.0282(8) Uani 1 1 d . . . 
H19A H -0.2077 0.4741 0.2592 0.042 Uiso 1 1 calc R . . 
H19B H -0.0604 0.4042 0.2650 0.042 Uiso 1 1 calc R . . 
H19C H -0.1450 0.3711 0.3322 0.042 Uiso 1 1 calc R . . 
C20 C -0.1763(3) 0.3725(3) 0.1376(2) 0.0316(9) Uani 1 1 d . . . 
H20A H -0.1981 0.3256 0.1063 0.047 Uiso 1 1 calc R . . 
H20B H -0.0969 0.3785 0.1214 0.047 Uiso 1 1 calc R . . 
H20C H -0.2421 0.4477 0.1283 0.047 Uiso 1 1 calc R . . 
C21 C 0.2171(3) 0.5657(3) 0.48142(19) 0.0199(7) Uani 1 1 d . . . 
H21 H 0.1979 0.6248 0.5103 0.024 Uiso 1 1 calc R . . 
C22 C 0.2666(3) 0.4588(3) 0.52138(19) 0.0201(7) Uani 1 1 d . . . 
H22 H 0.2804 0.4391 0.5778 0.024 Uiso 1 1 calc R . . 
C23 C 0.1437(3) 0.7042(3) 0.36453(19) 0.0195(7) Uani 1 1 d . . . 
H23 H 0.1312 0.7588 0.3968 0.023 Uiso 1 1 calc R . . 
C24 C 0.1124(3) 0.7390(3) 0.28632(19) 0.0191(7) Uani 1 1 d . . . 
H24 H 0.0765 0.8163 0.2617 0.023 Uiso 1 1 calc R . . 
C25 C 0.4813(3) 0.2975(3) 0.46858(19) 0.0212(7) Uani 1 1 d . . . 
C26 C 0.5366(4) 0.1935(4) 0.4339(3) 0.0467(12) Uani 1 1 d . . . 
H26A H 0.6271 0.1736 0.4320 0.070 Uiso 1 1 calc R . . 
H26B H 0.4991 0.2078 0.3798 0.070 Uiso 1 1 calc R . . 
H26C H 0.5197 0.1314 0.4673 0.070 Uiso 1 1 calc R . . 
C27 C 0.5359(4) 0.2758(4) 0.5546(2) 0.0460(12) Uani 1 1 d . . . 
H27A H 0.5165 0.2148 0.5876 0.069 Uiso 1 1 calc R . . 
H27B H 0.4993 0.3444 0.5764 0.069 Uiso 1 1 calc R . . 
H27C H 0.6268 0.2546 0.5547 0.069 Uiso 1 1 calc R . . 
C28 C 0.5188(3) 0.3906(3) 0.4201(2) 0.0314(9) Uani 1 1 d . . . 
H28A H 0.6100 0.3670 0.4239 0.047 Uiso 1 1 calc R . . 
H28B H 0.4811 0.4596 0.4411 0.047 Uiso 1 1 calc R . . 
H28C H 0.4892 0.4047 0.3641 0.047 Uiso 1 1 calc R . . 
C29 C 0.2389(3) 0.2509(3) 0.50809(18) 0.0184(7) Uani 1 1 d . . . 
C30 C 0.0983(3) 0.3166(3) 0.5072(2) 0.0256(8) Uani 1 1 d . . . 
H30A H 0.0569 0.2651 0.5300 0.038 Uiso 1 1 calc R . . 
H30B H 0.0648 0.3516 0.4521 0.038 Uiso 1 1 calc R . . 
H30C H 0.0830 0.3750 0.5388 0.038 Uiso 1 1 calc R . . 
C31 C 0.2627(3) 0.1561(3) 0.4612(2) 0.0265(8) Uani 1 1 d . . . 
H31A H 0.3525 0.1120 0.4637 0.040 Uiso 1 1 calc R . . 
H31B H 0.2318 0.1888 0.4054 0.040 Uiso 1 1 calc R . . 
H31C H 0.2188 0.1070 0.4845 0.040 Uiso 1 1 calc R . . 
C32 C 0.2907(4) 0.1972(4) 0.5943(2) 0.0414(11) Uani 1 1 d . . . 
H32A H 0.2856 0.2563 0.6237 0.062 Uiso 1 1 calc R . . 
H32B H 0.3781 0.1468 0.5947 0.062 Uiso 1 1 calc R . . 
H32C H 0.2415 0.1542 0.6197 0.062 Uiso 1 1 calc R . . 
C33 C 0.2627(3) 0.6528(3) 0.1622(2) 0.0238(8) Uani 1 1 d . . . 
C34 C 0.3887(3) 0.5964(3) 0.2107(2) 0.0340(9) Uani 1 1 d . . . 
H34A H 0.4538 0.6114 0.1788 0.051 Uiso 1 1 calc R . . 
H34B H 0.4090 0.5150 0.2248 0.051 Uiso 1 1 calc R . . 
H34C H 0.3838 0.6266 0.2594 0.051 Uiso 1 1 calc R . . 
C35 C 0.2412(4) 0.7768(3) 0.1336(2) 0.0324(9) Uani 1 1 d . . . 
H35A H 0.2453 0.8105 0.1796 0.049 Uiso 1 1 calc R . . 
H35B H 0.1587 0.8158 0.1051 0.049 Uiso 1 1 calc R . . 
H35C H 0.3058 0.7837 0.0977 0.049 Uiso 1 1 calc R . . 
C36 C 0.2666(4) 0.5985(3) 0.0896(2) 0.0359(10) Uani 1 1 d . . . 
H36A H 0.1933 0.6440 0.0531 0.054 Uiso 1 1 calc R . . 
H36B H 0.2663 0.5226 0.1073 0.054 Uiso 1 1 calc R . . 
H36C H 0.3427 0.5942 0.0622 0.054 Uiso 1 1 calc R . . 
C37 C -0.0096(3) 0.6632(3) 0.1755(2) 0.0247(8) Uani 1 1 d . . . 
C38 C -0.0563(4) 0.7772(3) 0.1171(2) 0.0345(9) Uani 1 1 d . . . 
H38A H -0.0014 0.7742 0.0729 0.052 Uiso 1 1 calc R . . 
H38B H -0.0558 0.8362 0.1450 0.052 Uiso 1 1 calc R . . 
H38C H -0.1416 0.7940 0.0963 0.052 Uiso 1 1 calc R . . 
C39 C -0.0038(4) 0.5695(3) 0.1312(2) 0.0309(9) Uani 1 1 d . . . 
H39A H -0.0888 0.5776 0.1155 0.046 Uiso 1 1 calc R . . 
H39B H 0.0381 0.4961 0.1663 0.046 Uiso 1 1 calc R . . 
H39C H 0.0429 0.5750 0.0835 0.046 Uiso 1 1 calc R . . 
C40 C -0.1039(3) 0.6689(3) 0.2404(2) 0.0327(9) Uani 1 1 d . . . 
H40A H -0.1151 0.7340 0.2647 0.049 Uiso 1 1 calc R . . 
H40B H -0.0724 0.5999 0.2814 0.049 Uiso 1 1 calc R . . 
H40C H -0.1842 0.6765 0.2164 0.049 Uiso 1 1 calc R . . 
 
loop_ 
 _atom_site_aniso_label 
 _atom_site_aniso_U_11 
 _atom_site_aniso_U_22 
 _atom_site_aniso_U_33 
 _atom_site_aniso_U_23 
 _atom_site_aniso_U_13 
 _atom_site_aniso_U_12 
Ir1 0.01352(6) 0.01200(6) 0.01353(6) -0.00364(5) 0.00109(4) -0.00516(5) 
Ir2 0.01427(6) 0.01040(6) 0.01392(6) -0.00288(5) 0.00084(4) -0.00470(5) 
P1 0.0158(4) 0.0162(4) 0.0155(4) -0.0043(3) 0.0019(3) -0.0049(3) 
P2 0.0150(4) 0.0179(4) 0.0179(4) -0.0039(3) 0.0015(3) -0.0076(3) 
P3 0.0140(4) 0.0151(4) 0.0147(4) -0.0037(3) 0.0010(3) -0.0058(3) 
P4 0.0188(4) 0.0110(4) 0.0176(4) -0.0014(3) 0.0013(3) -0.0044(3) 
N1 0.0223(15) 0.0152(14) 0.0165(12) -0.0044(11) 0.0012(11) -0.0086(12) 
N2 0.0166(14) 0.0141(14) 0.0205(13) -0.0080(11) 0.0023(11) -0.0059(11) 
N3 0.0166(14) 0.0149(13) 0.0141(12) -0.0017(11) 0.0013(10) -0.0055(11) 
N4 0.0166(14) 0.0125(13) 0.0167(12) -0.0006(11) 0.0014(10) -0.0043(11) 
C1 0.0265(18) 0.0148(16) 0.0140(14) -0.0034(12) -0.0005(13) -0.0070(14) 
C2 0.0248(18) 0.0177(17) 0.0126(14) -0.0031(13) 0.0015(13) -0.0066(14) 
C3 0.0263(19) 0.0242(19) 0.0193(15) -0.0060(14) -0.0022(14) -0.0127(15) 
C4 0.0233(18) 0.030(2) 0.0261(17) -0.0099(15) 0.0029(14) -0.0148(16) 
C5 0.0179(17) 0.0224(18) 0.0200(16) -0.0045(14) -0.0023(13) 0.0012(14) 
C6 0.0204(19) 0.040(2) 0.0296(19) -0.0114(18) -0.0006(15) 0.0030(17) 
C7 0.031(2) 0.026(2) 0.0259(18) 0.0008(16) -0.0063(16) -0.0013(17) 
C8 0.026(2) 0.035(2) 0.0252(18) -0.0086(16) -0.0049(15) -0.0014(17) 
C9 0.0213(18) 0.0243(19) 0.0224(16) -0.0065(14) 0.0096(14) -0.0108(15) 
C10 0.028(2) 0.032(2) 0.036(2) -0.0096(17) 0.0042(16) -0.0173(17) 
C11 0.032(2) 0.0177(18) 0.0231(17) 0.0000(14) 0.0005(15) -0.0074(15) 
C12 0.041(2) 0.033(2) 0.034(2) -0.0072(18) 0.0183(18) -0.0177(19) 
C13 0.0204(17) 0.0125(16) 0.0215(15) -0.0024(13) 0.0040(13) -0.0076(13) 
C14 0.029(2) 0.0163(17) 0.0257(17) 0.0018(14) -0.0009(15) -0.0116(15) 
C15 0.028(2) 0.0239(19) 0.0303(18) -0.0049(15) 0.0062(15) -0.0162(16) 
C16 0.030(2) 0.0244(19) 0.0208(16) -0.0047(14) 0.0041(14) -0.0118(16) 
C17 0.0159(17) 0.0212(18) 0.0264(17) -0.0029(14) 0.0011(14) -0.0037(14) 
C18 0.0172(18) 0.034(2) 0.041(2) -0.0056(18) 0.0019(16) -0.0076(16) 
C19 0.027(2) 0.0173(18) 0.036(2) -0.0037(16) 0.0057(16) -0.0048(15) 
C20 0.025(2) 0.036(2) 0.0292(19) 0.0020(17) -0.0036(16) -0.0097(17) 
C21 0.0168(16) 0.0236(18) 0.0224(16) -0.0113(14) 0.0018(13) -0.0077(14) 
C22 0.0201(17) 0.0213(18) 0.0175(15) -0.0063(13) 0.0009(13) -0.0048(14) 
C23 0.0193(17) 0.0144(16) 0.0279(17) -0.0093(14) 0.0061(14) -0.0073(14) 
C24 0.0193(17) 0.0109(16) 0.0255(16) -0.0041(13) 0.0047(13) -0.0035(13) 
C25 0.0152(16) 0.0245(19) 0.0224(16) -0.0010(14) -0.0002(13) -0.0073(14) 
C26 0.024(2) 0.035(2) 0.087(4) -0.027(2) 0.020(2) -0.0110(19) 
C27 0.022(2) 0.075(3) 0.029(2) 0.008(2) -0.0079(17) -0.012(2) 
C28 0.0218(19) 0.032(2) 0.044(2) -0.0111(18) 0.0059(17) -0.0119(17) 
C29 0.0169(16) 0.0233(18) 0.0163(15) -0.0028(13) 0.0011(12) -0.0095(14) 
C30 0.0167(17) 0.030(2) 0.0358(19) -0.0110(16) 0.0115(15) -0.0126(15) 
C31 0.0192(18) 0.0199(18) 0.041(2) -0.0049(16) 0.0050(16) -0.0093(15) 
C32 0.052(3) 0.054(3) 0.0238(19) 0.0099(19) -0.0069(19) -0.035(2) 
C33 0.0284(19) 0.0168(17) 0.0244(17) -0.0036(14) 0.0110(15) -0.0066(15) 
C34 0.024(2) 0.028(2) 0.045(2) 0.0035(18) 0.0101(17) -0.0084(17) 
C35 0.035(2) 0.0208(19) 0.040(2) -0.0035(17) 0.0139(18) -0.0103(17) 
C36 0.052(3) 0.028(2) 0.031(2) -0.0115(17) 0.0173(19) -0.016(2) 
C37 0.0265(19) 0.0157(17) 0.0267(17) 0.0005(14) -0.0084(15) -0.0037(15) 
C38 0.036(2) 0.0205(19) 0.038(2) 0.0093(17) -0.0140(18) -0.0075(17) 
C39 0.038(2) 0.025(2) 0.0282(19) 0.0000(16) -0.0093(17) -0.0127(17) 
C40 0.0223(19) 0.025(2) 0.047(2) -0.0018(18) -0.0019(17) -0.0067(16) 
 
_geom_special_details 
; 
 All esds (except the esd in the dihedral angle between two l.s. planes) 
 are estimated using the full covariance matrix.  The cell esds are taken 
 into account individually in the estimation of esds in distances, angles 
 and torsion angles; correlations between esds in cell parameters are only 
 used when they are defined by crystal symmetry.  An approximate (isotropic) 
 treatment of cell esds is used for estimating esds involving l.s. planes. 
; 
 
loop_ 
 _geom_bond_atom_site_label_1 
 _geom_bond_atom_site_label_2 
 _geom_bond_distance 
 _geom_bond_site_symmetry_2 
 _geom_bond_publ_flag 
Ir1 N3 1.937(3) . ? 
Ir1 N1 2.041(3) . ? 
Ir1 P1 2.3134(8) . ? 
Ir1 P2 2.3354(9) . ? 
Ir2 N4 1.933(3) . ? 
Ir2 N2 2.035(3) . ? 
Ir2 P3 2.3364(8) . ? 
Ir2 P4 2.3443(8) . ? 
P1 C2 1.786(3) . ? 
P1 C9 1.877(3) . ? 
P1 C5 1.883(3) . ? 
P2 C4 1.792(3) . ? 
P2 C17 1.872(3) . ? 
P2 C13 1.897(3) . ? 
P3 C22 1.784(3) . ? 
P3 C29 1.869(3) . ? 
P3 C25 1.895(3) . ? 
P4 C24 1.785(3) . ? 
P4 C37 1.877(3) . ? 
P4 C33 1.887(3) . ? 
N1 C3 1.362(4) . ? 
N1 C1 1.379(4) . ? 
N2 C23 1.373(4) . ? 
N2 C21 1.380(4) . ? 
N3 N4 1.135(4) . ? 
C1 C2 1.344(5) . ? 
C1 H1 0.9500 . ? 
C2 H2 0.9500 . ? 
C3 C4 1.354(5) . ? 
C3 H3 0.9500 . ? 
C4 H4 0.9500 . ? 
C5 C7 1.530(5) . ? 
C5 C8 1.536(5) . ? 
C5 C6 1.539(5) . ? 
C6 H6A 0.9800 . ? 
C6 H6B 0.9800 . ? 
C6 H6C 0.9800 . ? 
C7 H7A 0.9800 . ? 
C7 H7B 0.9800 . ? 
C7 H7C 0.9800 . ? 
C8 H8A 0.9800 . ? 
C8 H8B 0.9800 . ? 
C8 H8C 0.9800 . ? 
C9 C11 1.531(5) . ? 
C9 C12 1.532(5) . ? 
C9 C10 1.534(5) . ? 
C10 H10A 0.9800 . ? 
C10 H10B 0.9800 . ? 
C10 H10C 0.9800 . ? 
C11 H11A 0.9800 . ? 
C11 H11B 0.9800 . ? 
C11 H11C 0.9800 . ? 
C12 H12A 0.9800 . ? 
C12 H12B 0.9800 . ? 
C12 H12C 0.9800 . ? 
C13 C14 1.533(5) . ? 
C13 C15 1.536(5) . ? 
C13 C16 1.537(4) . ? 
C14 H14A 0.9800 . ? 
C14 H14B 0.9800 . ? 
C14 H14C 0.9800 . ? 
C15 H15A 0.9800 . ? 
C15 H15B 0.9800 . ? 
C15 H15C 0.9800 . ? 
C16 H16A 0.9800 . ? 
C16 H16B 0.9800 . ? 
C16 H16C 0.9800 . ? 
C17 C18 1.534(5) . ? 
C17 C19 1.539(5) . ? 
C17 C20 1.542(5) . ? 
C18 H18A 0.9800 . ? 
C18 H18B 0.9800 . ? 
C18 H18C 0.9800 . ? 
C19 H19A 0.9800 . ? 
C19 H19B 0.9800 . ? 
C19 H19C 0.9800 . ? 
C20 H20A 0.9800 . ? 
C20 H20B 0.9800 . ? 
C20 H20C 0.9800 . ? 
C21 C22 1.342(5) . ? 
C21 H21 0.9500 . ? 
C22 H22 0.9500 . ? 
C23 C24 1.336(4) . ? 
C23 H23 0.9500 . ? 
C24 H24 0.9500 . ? 
C25 C26 1.503(5) . ? 
C25 C28 1.532(5) . ? 
C25 C27 1.541(5) . ? 
C26 H26A 0.9800 . ? 
C26 H26B 0.9800 . ? 
C26 H26C 0.9800 . ? 
C27 H27A 0.9800 . ? 
C27 H27B 0.9800 . ? 
C27 H27C 0.9800 . ? 
C28 H28A 0.9800 . ? 
C28 H28B 0.9800 . ? 
C28 H28C 0.9800 . ? 
C29 C30 1.530(4) . ? 
C29 C32 1.530(5) . ? 
C29 C31 1.539(5) . ? 
C30 H30A 0.9800 . ? 
C30 H30B 0.9800 . ? 
C30 H30C 0.9800 . ? 
C31 H31A 0.9800 . ? 
C31 H31B 0.9800 . ? 
C31 H31C 0.9800 . ? 
C32 H32A 0.9800 . ? 
C32 H32B 0.9800 . ? 
C32 H32C 0.9800 . ? 
C33 C35 1.524(5) . ? 
C33 C34 1.532(5) . ? 
C33 C36 1.533(5) . ? 
C34 H34A 0.9800 . ? 
C34 H34B 0.9800 . ? 
C34 H34C 0.9800 . ? 
C35 H35A 0.9800 . ? 
C35 H35B 0.9800 . ? 
C35 H35C 0.9800 . ? 
C36 H36A 0.9800 . ? 
C36 H36B 0.9800 . ? 
C36 H36C 0.9800 . ? 
C37 C39 1.535(5) . ? 
C37 C38 1.537(5) . ? 
C37 C40 1.540(5) . ? 
C38 H38A 0.9800 . ? 
C38 H38B 0.9800 . ? 
C38 H38C 0.9800 . ? 
C39 H39A 0.9800 . ? 
C39 H39B 0.9800 . ? 
C39 H39C 0.9800 . ? 
C40 H40A 0.9800 . ? 
C40 H40B 0.9800 . ? 
C40 H40C 0.9800 . ? 
 
loop_ 
 _geom_angle_atom_site_label_1 
 _geom_angle_atom_site_label_2 
 _geom_angle_atom_site_label_3 
 _geom_angle 
 _geom_angle_site_symmetry_1 
 _geom_angle_site_symmetry_3 
 _geom_angle_publ_flag 
N3 Ir1 N1 173.64(10) . . ? 
N3 Ir1 P1 96.88(8) . . ? 
N1 Ir1 P1 81.26(8) . . ? 
N3 Ir1 P2 101.28(8) . . ? 
N1 Ir1 P2 81.22(8) . . ? 
P1 Ir1 P2 161.11(3) . . ? 
N4 Ir2 N2 170.98(11) . . ? 
N4 Ir2 P3 99.06(8) . . ? 
N2 Ir2 P3 80.70(8) . . ? 
N4 Ir2 P4 100.33(8) . . ? 
N2 Ir2 P4 80.87(8) . . ? 
P3 Ir2 P4 160.09(3) . . ? 
C2 P1 C9 103.64(15) . . ? 
C2 P1 C5 104.92(15) . . ? 
C9 P1 C5 112.02(16) . . ? 
C2 P1 Ir1 101.88(11) . . ? 
C9 P1 Ir1 119.18(11) . . ? 
C5 P1 Ir1 113.05(11) . . ? 
C4 P2 C17 103.75(16) . . ? 
C4 P2 C13 103.05(15) . . ? 
C17 P2 C13 110.42(15) . . ? 
C4 P2 Ir1 100.75(12) . . ? 
C17 P2 Ir1 119.12(11) . . ? 
C13 P2 Ir1 116.82(11) . . ? 
C22 P3 C29 104.64(15) . . ? 
C22 P3 C25 102.44(15) . . ? 
C29 P3 C25 111.57(15) . . ? 
C22 P3 Ir2 101.08(11) . . ? 
C29 P3 Ir2 119.23(10) . . ? 
C25 P3 Ir2 115.08(11) . . ? 
C24 P4 C37 103.82(16) . . ? 
C24 P4 C33 102.29(15) . . ? 
C37 P4 C33 110.87(16) . . ? 
C24 P4 Ir2 100.73(11) . . ? 
C37 P4 Ir2 119.11(12) . . ? 
C33 P4 Ir2 116.84(11) . . ? 
C3 N1 C1 118.2(3) . . ? 
C3 N1 Ir1 121.4(2) . . ? 
C1 N1 Ir1 120.4(2) . . ? 
C23 N2 C21 117.4(3) . . ? 
C23 N2 Ir2 121.3(2) . . ? 
C21 N2 Ir2 121.0(2) . . ? 
N4 N3 Ir1 174.6(2) . . ? 
N3 N4 Ir2 172.3(3) . . ? 
C2 C1 N1 122.7(3) . . ? 
C2 C1 H1 118.7 . . ? 
N1 C1 H1 118.7 . . ? 
C1 C2 P1 113.6(2) . . ? 
C1 C2 H2 123.2 . . ? 
P1 C2 H2 123.2 . . ? 
C4 C3 N1 121.9(3) . . ? 
C4 C3 H3 119.1 . . ? 
N1 C3 H3 119.1 . . ? 
C3 C4 P2 114.5(3) . . ? 
C3 C4 H4 122.7 . . ? 
P2 C4 H4 122.7 . . ? 
C7 C5 C8 109.2(3) . . ? 
C7 C5 C6 108.4(3) . . ? 
C8 C5 C6 109.4(3) . . ? 
C7 C5 P1 105.9(2) . . ? 
C8 C5 P1 109.0(2) . . ? 
C6 C5 P1 114.7(2) . . ? 
C5 C6 H6A 109.5 . . ? 
C5 C6 H6B 109.5 . . ? 
H6A C6 H6B 109.5 . . ? 
C5 C6 H6C 109.5 . . ? 
H6A C6 H6C 109.5 . . ? 
H6B C6 H6C 109.5 . . ? 
C5 C7 H7A 109.5 . . ? 
C5 C7 H7B 109.5 . . ? 
H7A C7 H7B 109.5 . . ? 
C5 C7 H7C 109.5 . . ? 
H7A C7 H7C 109.5 . . ? 
H7B C7 H7C 109.5 . . ? 
C5 C8 H8A 109.5 . . ? 
C5 C8 H8B 109.5 . . ? 
H8A C8 H8B 109.5 . . ? 
C5 C8 H8C 109.5 . . ? 
H8A C8 H8C 109.5 . . ? 
H8B C8 H8C 109.5 . . ? 
C11 C9 C12 107.8(3) . . ? 
C11 C9 C10 110.0(3) . . ? 
C12 C9 C10 109.3(3) . . ? 
C11 C9 P1 104.3(2) . . ? 
C12 C9 P1 113.9(2) . . ? 
C10 C9 P1 111.3(2) . . ? 
C9 C10 H10A 109.5 . . ? 
C9 C10 H10B 109.5 . . ? 
H10A C10 H10B 109.5 . . ? 
C9 C10 H10C 109.5 . . ? 
H10A C10 H10C 109.5 . . ? 
H10B C10 H10C 109.5 . . ? 
C9 C11 H11A 109.5 . . ? 
C9 C11 H11B 109.5 . . ? 
H11A C11 H11B 109.5 . . ? 
C9 C11 H11C 109.5 . . ? 
H11A C11 H11C 109.5 . . ? 
H11B C11 H11C 109.5 . . ? 
C9 C12 H12A 109.5 . . ? 
C9 C12 H12B 109.5 . . ? 
H12A C12 H12B 109.5 . . ? 
C9 C12 H12C 109.5 . . ? 
H12A C12 H12C 109.5 . . ? 
H12B C12 H12C 109.5 . . ? 
C14 C13 C15 108.6(3) . . ? 
C14 C13 C16 108.9(3) . . ? 
C15 C13 C16 108.9(3) . . ? 
C14 C13 P2 105.6(2) . . ? 
C15 C13 P2 113.1(2) . . ? 
C16 C13 P2 111.6(2) . . ? 
C13 C14 H14A 109.5 . . ? 
C13 C14 H14B 109.5 . . ? 
H14A C14 H14B 109.5 . . ? 
C13 C14 H14C 109.5 . . ? 
H14A C14 H14C 109.5 . . ? 
H14B C14 H14C 109.5 . . ? 
C13 C15 H15A 109.5 . . ? 
C13 C15 H15B 109.5 . . ? 
H15A C15 H15B 109.5 . . ? 
C13 C15 H15C 109.5 . . ? 
H15A C15 H15C 109.5 . . ? 
H15B C15 H15C 109.5 . . ? 
C13 C16 H16A 109.5 . . ? 
C13 C16 H16B 109.5 . . ? 
H16A C16 H16B 109.5 . . ? 
C13 C16 H16C 109.5 . . ? 
H16A C16 H16C 109.5 . . ? 
H16B C16 H16C 109.5 . . ? 
C18 C17 C19 109.6(3) . . ? 
C18 C17 C20 108.3(3) . . ? 
C19 C17 C20 108.4(3) . . ? 
C18 C17 P2 113.5(3) . . ? 
C19 C17 P2 111.5(2) . . ? 
C20 C17 P2 105.3(2) . . ? 
C17 C18 H18A 109.5 . . ? 
C17 C18 H18B 109.5 . . ? 
H18A C18 H18B 109.5 . . ? 
C17 C18 H18C 109.5 . . ? 
H18A C18 H18C 109.5 . . ? 
H18B C18 H18C 109.5 . . ? 
C17 C19 H19A 109.5 . . ? 
C17 C19 H19B 109.5 . . ? 
H19A C19 H19B 109.5 . . ? 
C17 C19 H19C 109.5 . . ? 
H19A C19 H19C 109.5 . . ? 
H19B C19 H19C 109.5 . . ? 
C17 C20 H20A 109.5 . . ? 
C17 C20 H20B 109.5 . . ? 
H20A C20 H20B 109.5 . . ? 
C17 C20 H20C 109.5 . . ? 
H20A C20 H20C 109.5 . . ? 
H20B C20 H20C 109.5 . . ? 
C22 C21 N2 122.0(3) . . ? 
C22 C21 H21 119.0 . . ? 
N2 C21 H21 119.0 . . ? 
C21 C22 P3 114.1(2) . . ? 
C21 C22 H22 122.9 . . ? 
P3 C22 H22 122.9 . . ? 
C24 C23 N2 122.1(3) . . ? 
C24 C23 H23 118.9 . . ? 
N2 C23 H23 118.9 . . ? 
C23 C24 P4 114.7(3) . . ? 
C23 C24 H24 122.7 . . ? 
P4 C24 H24 122.7 . . ? 
C26 C25 C28 108.7(3) . . ? 
C26 C25 C27 110.4(3) . . ? 
C28 C25 C27 106.7(3) . . ? 
C26 C25 P3 112.7(3) . . ? 
C28 C25 P3 104.7(2) . . ? 
C27 C25 P3 113.2(2) . . ? 
C25 C26 H26A 109.5 . . ? 
C25 C26 H26B 109.5 . . ? 
H26A C26 H26B 109.5 . . ? 
C25 C26 H26C 109.5 . . ? 
H26A C26 H26C 109.5 . . ? 
H26B C26 H26C 109.5 . . ? 
C25 C27 H27A 109.5 . . ? 
C25 C27 H27B 109.5 . . ? 
H27A C27 H27B 109.5 . . ? 
C25 C27 H27C 109.5 . . ? 
H27A C27 H27C 109.5 . . ? 
H27B C27 H27C 109.5 . . ? 
C25 C28 H28A 109.5 . . ? 
C25 C28 H28B 109.5 . . ? 
H28A C28 H28B 109.5 . . ? 
C25 C28 H28C 109.5 . . ? 
H28A C28 H28C 109.5 . . ? 
H28B C28 H28C 109.5 . . ? 
C30 C29 C32 109.2(3) . . ? 
C30 C29 C31 109.5(3) . . ? 
C32 C29 C31 108.2(3) . . ? 
C30 C29 P3 104.9(2) . . ? 
C32 C29 P3 113.5(2) . . ? 
C31 C29 P3 111.5(2) . . ? 
C29 C30 H30A 109.5 . . ? 
C29 C30 H30B 109.5 . . ? 
H30A C30 H30B 109.5 . . ? 
C29 C30 H30C 109.5 . . ? 
H30A C30 H30C 109.5 . . ? 
H30B C30 H30C 109.5 . . ? 
C29 C31 H31A 109.5 . . ? 
C29 C31 H31B 109.5 . . ? 
H31A C31 H31B 109.5 . . ? 
C29 C31 H31C 109.5 . . ? 
H31A C31 H31C 109.5 . . ? 
H31B C31 H31C 109.5 . . ? 
C29 C32 H32A 109.5 . . ? 
C29 C32 H32B 109.5 . . ? 
H32A C32 H32B 109.5 . . ? 
C29 C32 H32C 109.5 . . ? 
H32A C32 H32C 109.5 . . ? 
H32B C32 H32C 109.5 . . ? 
C35 C33 C34 107.9(3) . . ? 
C35 C33 C36 109.1(3) . . ? 
C34 C33 C36 109.5(3) . . ? 
C35 C33 P4 113.4(2) . . ? 
C34 C33 P4 105.8(2) . . ? 
C36 C33 P4 111.0(3) . . ? 
C33 C34 H34A 109.5 . . ? 
C33 C34 H34B 109.5 . . ? 
H34A C34 H34B 109.5 . . ? 
C33 C34 H34C 109.5 . . ? 
H34A C34 H34C 109.5 . . ? 
H34B C34 H34C 109.5 . . ? 
C33 C35 H35A 109.5 . . ? 
C33 C35 H35B 109.5 . . ? 
H35A C35 H35B 109.5 . . ? 
C33 C35 H35C 109.5 . . ? 
H35A C35 H35C 109.5 . . ? 
H35B C35 H35C 109.5 . . ? 
C33 C36 H36A 109.5 . . ? 
C33 C36 H36B 109.5 . . ? 
H36A C36 H36B 109.5 . . ? 
C33 C36 H36C 109.5 . . ? 
H36A C36 H36C 109.5 . . ? 
H36B C36 H36C 109.5 . . ? 
C39 C37 C38 109.7(3) . . ? 
C39 C37 C40 109.1(3) . . ? 
C38 C37 C40 107.7(3) . . ? 
C39 C37 P4 110.9(2) . . ? 
C38 C37 P4 114.6(3) . . ? 
C40 C37 P4 104.5(2) . . ? 
C37 C38 H38A 109.5 . . ? 
C37 C38 H38B 109.5 . . ? 
H38A C38 H38B 109.5 . . ? 
C37 C38 H38C 109.5 . . ? 
H38A C38 H38C 109.5 . . ? 
H38B C38 H38C 109.5 . . ? 
C37 C39 H39A 109.5 . . ? 
C37 C39 H39B 109.5 . . ? 
H39A C39 H39B 109.5 . . ? 
C37 C39 H39C 109.5 . . ? 
H39A C39 H39C 109.5 . . ? 
H39B C39 H39C 109.5 . . ? 
C37 C40 H40A 109.5 . . ? 
C37 C40 H40B 109.5 . . ? 
H40A C40 H40B 109.5 . . ? 
C37 C40 H40C 109.5 . . ? 
H40A C40 H40C 109.5 . . ? 
H40B C40 H40C 109.5 . . ? 
 
loop_ 
 _geom_torsion_atom_site_label_1 
 _geom_torsion_atom_site_label_2 
 _geom_torsion_atom_site_label_3 
 _geom_torsion_atom_site_label_4 
 _geom_torsion 
 _geom_torsion_site_symmetry_1 
 _geom_torsion_site_symmetry_2 
 _geom_torsion_site_symmetry_3 
 _geom_torsion_site_symmetry_4 
 _geom_torsion_publ_flag 
N3 Ir1 P1 C2 -170.09(13) . . . . ? 
N1 Ir1 P1 C2 3.78(13) . . . . ? 
P2 Ir1 P1 C2 25.84(15) . . . . ? 
N3 Ir1 P1 C9 -56.91(15) . . . . ? 
N1 Ir1 P1 C9 116.95(15) . . . . ? 
P2 Ir1 P1 C9 139.01(14) . . . . ? 
N3 Ir1 P1 C5 77.86(15) . . . . ? 
N1 Ir1 P1 C5 -108.28(15) . . . . ? 
P2 Ir1 P1 C5 -86.22(15) . . . . ? 
N3 Ir1 P2 C4 170.53(14) . . . . ? 
N1 Ir1 P2 C4 -3.53(14) . . . . ? 
P1 Ir1 P2 C4 -25.59(16) . . . . ? 
N3 Ir1 P2 C17 58.04(15) . . . . ? 
N1 Ir1 P2 C17 -116.03(15) . . . . ? 
P1 Ir1 P2 C17 -138.09(14) . . . . ? 
N3 Ir1 P2 C13 -78.77(14) . . . . ? 
N1 Ir1 P2 C13 107.17(14) . . . . ? 
P1 Ir1 P2 C13 85.10(14) . . . . ? 
N4 Ir2 P3 C22 -162.45(14) . . . . ? 
N2 Ir2 P3 C22 8.41(14) . . . . ? 
P4 Ir2 P3 C22 30.78(15) . . . . ? 
N4 Ir2 P3 C29 -48.58(15) . . . . ? 
N2 Ir2 P3 C29 122.28(14) . . . . ? 
P4 Ir2 P3 C29 144.65(13) . . . . ? 
N4 Ir2 P3 C25 88.04(15) . . . . ? 
N2 Ir2 P3 C25 -101.10(14) . . . . ? 
P4 Ir2 P3 C25 -78.72(15) . . . . ? 
N4 Ir2 P4 C24 166.98(14) . . . . ? 
N2 Ir2 P4 C24 -3.95(13) . . . . ? 
P3 Ir2 P4 C24 -26.31(15) . . . . ? 
N4 Ir2 P4 C37 54.41(16) . . . . ? 
N2 Ir2 P4 C37 -116.52(15) . . . . ? 
P3 Ir2 P4 C37 -138.88(15) . . . . ? 
N4 Ir2 P4 C33 -83.22(15) . . . . ? 
N2 Ir2 P4 C33 105.85(15) . . . . ? 
P3 Ir2 P4 C33 83.49(15) . . . . ? 
P1 Ir1 N1 C3 177.3(3) . . . . ? 
P2 Ir1 N1 C3 4.4(2) . . . . ? 
P1 Ir1 N1 C1 -4.1(2) . . . . ? 
P2 Ir1 N1 C1 -177.0(2) . . . . ? 
P3 Ir2 N2 C23 176.9(2) . . . . ? 
P4 Ir2 N2 C23 4.4(2) . . . . ? 
P3 Ir2 N2 C21 -9.3(2) . . . . ? 
P4 Ir2 N2 C21 178.2(2) . . . . ? 
C3 N1 C1 C2 -178.5(3) . . . . ? 
Ir1 N1 C1 C2 2.8(4) . . . . ? 
N1 C1 C2 P1 1.2(4) . . . . ? 
C9 P1 C2 C1 -128.1(3) . . . . ? 
C5 P1 C2 C1 114.3(3) . . . . ? 
Ir1 P1 C2 C1 -3.8(3) . . . . ? 
C1 N1 C3 C4 177.8(3) . . . . ? 
Ir1 N1 C3 C4 -3.6(4) . . . . ? 
N1 C3 C4 P2 -0.4(5) . . . . ? 
C17 P2 C4 C3 127.0(3) . . . . ? 
C13 P2 C4 C3 -117.8(3) . . . . ? 
Ir1 P2 C4 C3 3.2(3) . . . . ? 
C2 P1 C5 C7 -51.1(3) . . . . ? 
C9 P1 C5 C7 -162.9(2) . . . . ? 
Ir1 P1 C5 C7 59.0(2) . . . . ? 
C2 P1 C5 C8 -168.6(3) . . . . ? 
C9 P1 C5 C8 79.7(3) . . . . ? 
Ir1 P1 C5 C8 -58.4(3) . . . . ? 
C2 P1 C5 C6 68.3(3) . . . . ? 
C9 P1 C5 C6 -43.4(3) . . . . ? 
Ir1 P1 C5 C6 178.5(2) . . . . ? 
C2 P1 C9 C11 77.7(2) . . . . ? 
C5 P1 C9 C11 -169.7(2) . . . . ? 
Ir1 P1 C9 C11 -34.6(3) . . . . ? 
C2 P1 C9 C12 -39.6(3) . . . . ? 
C5 P1 C9 C12 73.0(3) . . . . ? 
Ir1 P1 C9 C12 -151.8(2) . . . . ? 
C2 P1 C9 C10 -163.7(2) . . . . ? 
C5 P1 C9 C10 -51.2(3) . . . . ? 
Ir1 P1 C9 C10 84.0(3) . . . . ? 
C4 P2 C13 C14 86.4(2) . . . . ? 
C17 P2 C13 C14 -163.3(2) . . . . ? 
Ir1 P2 C13 C14 -22.9(2) . . . . ? 
C4 P2 C13 C15 -32.2(3) . . . . ? 
C17 P2 C13 C15 78.0(3) . . . . ? 
Ir1 P2 C13 C15 -141.6(2) . . . . ? 
C4 P2 C13 C16 -155.4(2) . . . . ? 
C17 P2 C13 C16 -45.2(3) . . . . ? 
Ir1 P2 C13 C16 95.2(2) . . . . ? 
C4 P2 C17 C18 60.7(3) . . . . ? 
C13 P2 C17 C18 -49.1(3) . . . . ? 
Ir1 P2 C17 C18 171.6(2) . . . . ? 
C4 P2 C17 C19 -174.9(2) . . . . ? 
C13 P2 C17 C19 75.2(3) . . . . ? 
Ir1 P2 C17 C19 -64.1(3) . . . . ? 
C4 P2 C17 C20 -57.6(3) . . . . ? 
C13 P2 C17 C20 -167.4(2) . . . . ? 
Ir1 P2 C17 C20 53.3(3) . . . . ? 
C23 N2 C21 C22 -179.4(3) . . . . ? 
Ir2 N2 C21 C22 6.6(4) . . . . ? 
N2 C21 C22 P3 2.6(4) . . . . ? 
C29 P3 C22 C21 -132.8(3) . . . . ? 
C25 P3 C22 C21 110.6(3) . . . . ? 
Ir2 P3 C22 C21 -8.4(3) . . . . ? 
C21 N2 C23 C24 -177.2(3) . . . . ? 
Ir2 N2 C23 C24 -3.1(4) . . . . ? 
N2 C23 C24 P4 -1.2(4) . . . . ? 
C37 P4 C24 C23 127.8(3) . . . . ? 
C33 P4 C24 C23 -116.8(3) . . . . ? 
Ir2 P4 C24 C23 4.0(3) . . . . ? 
C22 P3 C25 C26 168.9(3) . . . . ? 
C29 P3 C25 C26 57.5(3) . . . . ? 
Ir2 P3 C25 C26 -82.4(3) . . . . ? 
C22 P3 C25 C28 -73.1(3) . . . . ? 
C29 P3 C25 C28 175.5(2) . . . . ? 
Ir2 P3 C25 C28 35.6(3) . . . . ? 
C22 P3 C25 C27 42.7(3) . . . . ? 
C29 P3 C25 C27 -68.8(3) . . . . ? 
Ir2 P3 C25 C27 151.4(3) . . . . ? 
C22 P3 C29 C30 61.2(2) . . . . ? 
C25 P3 C29 C30 171.2(2) . . . . ? 
Ir2 P3 C29 C30 -50.8(2) . . . . ? 
C22 P3 C29 C32 -58.0(3) . . . . ? 
C25 P3 C29 C32 52.1(3) . . . . ? 
Ir2 P3 C29 C32 -169.9(2) . . . . ? 
C22 P3 C29 C31 179.6(2) . . . . ? 
C25 P3 C29 C31 -70.4(3) . . . . ? 
Ir2 P3 C29 C31 67.6(2) . . . . ? 
C24 P4 C33 C35 -35.2(3) . . . . ? 
C37 P4 C33 C35 75.0(3) . . . . ? 
Ir2 P4 C33 C35 -144.1(2) . . . . ? 
C24 P4 C33 C34 82.9(3) . . . . ? 
C37 P4 C33 C34 -167.0(2) . . . . ? 
Ir2 P4 C33 C34 -26.0(3) . . . . ? 
C24 P4 C33 C36 -158.4(3) . . . . ? 
C37 P4 C33 C36 -48.3(3) . . . . ? 
Ir2 P4 C33 C36 92.7(3) . . . . ? 
C24 P4 C37 C39 -174.3(3) . . . . ? 
C33 P4 C37 C39 76.5(3) . . . . ? 
Ir2 P4 C37 C39 -63.5(3) . . . . ? 
C24 P4 C37 C38 60.7(3) . . . . ? 
C33 P4 C37 C38 -48.4(3) . . . . ? 
Ir2 P4 C37 C38 171.6(2) . . . . ? 
C24 P4 C37 C40 -56.8(3) . . . . ? 
C33 P4 C37 C40 -166.0(2) . . . . ? 
Ir2 P4 C37 C40 54.0(3) . . . . ? 
 
_diffrn_measured_fraction_theta_max    0.999 
_diffrn_reflns_theta_full              28.70 
_diffrn_measured_fraction_theta_full   0.999 
_refine_diff_density_max    1.160 
_refine_diff_density_min   -0.989 
_refine_diff_density_rms    0.131 
