# Supplementary material for: Closed-shell and open-shell square-planar iridium nitrido complexes
Source: Springer Nature journal article supplement (doi:10.1038/nchem.1368), 2012-06-01
Supplement: 41557_2012_BFnchem1368_MOESM10_ESM.mol [file 41557_2012_BFnchem1368_MOESM10_ESM.mol]

  ChemDraw05161213002D

 50 45  0  0  0  0  0  0  0  0999 V2000
   -1.5842    0.0036    0.0000 Ir  0  3  0  0  0  0  0  0  0  0  0  0
    1.4266    0.0033    0.0000 Ir  0  3  0  0  0  0  0  0  0  0  0  0
   -0.4616    0.0014    0.0000 N   0  0  0  0  0  0  0  0  0  0  0  0
    0.3634    0.0014    0.0000 N   0  0  0  0  0  0  0  0  0  0  0  0
   -2.5278    0.0036    0.0000 N   0  5  0  0  0  0  0  0  0  0  0  0
   -2.2483   -0.8736    0.0000 P   0  0  0  0  0  0  0  0  0  0  0  0
   -1.0076    0.8580    0.0000 P   0  0  0  0  0  0  0  0  0  0  0  0
   -3.2354   -0.3845    0.0000 C   0  0  0  0  0  0  0  0  0  0  0  0
   -3.0756   -0.9019    0.0000 C   0  0  0  0  0  0  0  0  0  0  0  0
   -2.4830    0.6048    0.0000 C   0  0  0  0  0  0  0  0  0  0  0  0
   -1.8095    0.8930    0.0000 C   0  0  0  0  0  0  0  0  0  0  0  0
   -0.1878    1.1668    0.0000 C   0  0  0  0  0  0  0  0  0  0  0  0
   -1.0846    1.6822    0.0000 C   0  0  0  0  0  0  0  0  0  0  0  0
   -1.8520    1.9850    0.0000 C   0  0  0  0  0  0  0  0  0  0  0  0
   -0.4248    2.1776    0.0000 C   0  0  0  0  0  0  0  0  0  0  0  0
   -1.1948    2.4998    0.0000 C   0  0  0  0  0  0  0  0  0  0  0  0
    0.0907    1.9434    0.0000 C   0  0  0  0  0  0  0  0  0  0  0  0
    0.3328    0.5268    0.0000 C   0  0  0  0  0  0  0  0  0  0  0  0
    0.6255    1.3058    0.0000 C   0  0  0  0  0  0  0  0  0  0  0  0
   -1.5118   -1.2514    0.0000 C   0  0  0  0  0  0  0  0  0  0  0  0
   -2.4559   -1.6749    0.0000 C   0  0  0  0  0  0  0  0  0  0  0  0
   -3.2509   -1.8951    0.0000 C   0  0  0  0  0  0  0  0  0  0  0  0
   -1.8677   -2.2534    0.0000 C   0  0  0  0  0  0  0  0  0  0  0  0
   -0.8187   -0.8039    0.0000 C   0  0  0  0  0  0  0  0  0  0  0  0
   -1.4708   -2.0754    0.0000 C   0  0  0  0  0  0  0  0  0  0  0  0
   -0.7346   -1.7788    0.0000 C   0  0  0  0  0  0  0  0  0  0  0  0
   -2.7748   -2.4388    0.0000 C   0  0  0  0  0  0  0  0  0  0  0  0
    2.4263   -0.0046    0.0000 N   0  5  0  0  0  0  0  0  0  0  0  0
    2.1947    0.8433    0.0000 P   0  0  0  0  0  0  0  0  0  0  0  0
    0.8622   -0.8187    0.0000 P   0  0  0  0  0  0  0  0  0  0  0  0
    3.1539    0.3448    0.0000 C   0  0  0  0  0  0  0  0  0  0  0  0
    3.0223    0.8270    0.0000 C   0  0  0  0  0  0  0  0  0  0  0  0
    2.3492   -0.6024    0.0000 C   0  0  0  0  0  0  0  0  0  0  0  0
    1.6612   -0.8970    0.0000 C   0  0  0  0  0  0  0  0  0  0  0  0
    0.0806   -1.0400    0.0000 C   0  0  0  0  0  0  0  0  0  0  0  0
    1.1102   -1.7106    0.0000 C   0  0  0  0  0  0  0  0  0  0  0  0
    1.9163   -1.8861    0.0000 C   0  0  0  0  0  0  0  0  0  0  0  0
    0.5387   -2.3056    0.0000 C   0  0  0  0  0  0  0  0  0  0  0  0
    1.3506   -2.4998    0.0000 C   0  0  0  0  0  0  0  0  0  0  0  0
   -0.1616   -1.8287    0.0000 C   0  0  0  0  0  0  0  0  0  0  0  0
   -0.4691   -0.4248    0.0000 C   0  0  0  0  0  0  0  0  0  0  0  0
   -0.7253   -1.2166    0.0000 C   0  0  0  0  0  0  0  0  0  0  0  0
    1.4796    1.2603    0.0000 C   0  0  0  0  0  0  0  0  0  0  0  0
    2.4452    1.6323    0.0000 C   0  0  0  0  0  0  0  0  0  0  0  0
    3.2509    1.8093    0.0000 C   0  0  0  0  0  0  0  0  0  0  0  0
    1.8890    2.2417    0.0000 C   0  0  0  0  0  0  0  0  0  0  0  0
    0.7633    0.8509    0.0000 C   0  0  0  0  0  0  0  0  0  0  0  0
    1.4831    2.0853    0.0000 C   0  0  0  0  0  0  0  0  0  0  0  0
    0.7669    1.6759    0.0000 C   0  0  0  0  0  0  0  0  0  0  0  0
    2.7768    2.3908    0.0000 C   0  0  0  0  0  0  0  0  0  0  0  0
  3  4  3  0      
  5  8  1  0      
  8  9  2  0      
  9  6  1  0      
  5 10  1  0      
 10 11  2  0      
 11  7  1  0      
  7 12  1  0      
  7 13  1  0      
 13 14  1  0      
 13 15  1  0      
 13 16  1  0      
 12 17  1  0      
 12 18  1  0      
 12 19  1  0      
  6 20  1  0      
  6 21  1  0      
 21 22  1  0      
 21 23  1  0      
 20 24  1  0      
 20 25  1  0      
 20 26  1  0      
 21 27  1  0      
 28 31  1  0      
 31 32  2  0      
 32 29  1  0      
 28 33  1  0      
 33 34  2  0      
 34 30  1  0      
 30 35  1  0      
 30 36  1  0      
 36 37  1  0      
 36 38  1  0      
 36 39  1  0      
 35 40  1  0      
 35 41  1  0      
 35 42  1  0      
 29 43  1  0      
 29 44  1  0      
 44 45  1  0      
 44 46  1  0      
 43 47  1  0      
 43 48  1  0      
 43 49  1  0      
 44 50  1  0      
M  CHG  4   1   1   2   1   5  -1  28  -1
M  END
